# Supplementary material
Source: Springer Nature journal article supplement (https://www.springermedizin.de/resource/supplementary/12885_2012_3728_MOESM1_ESM.pdf/9465954)

### MTT Assay

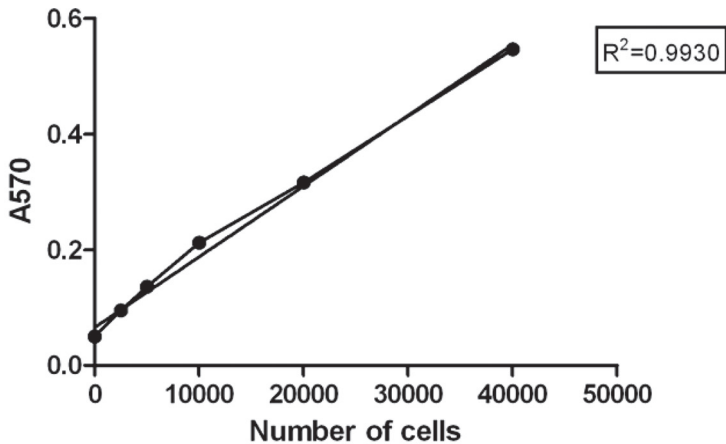

### $^{51}\text{Cr}$ Release Assay

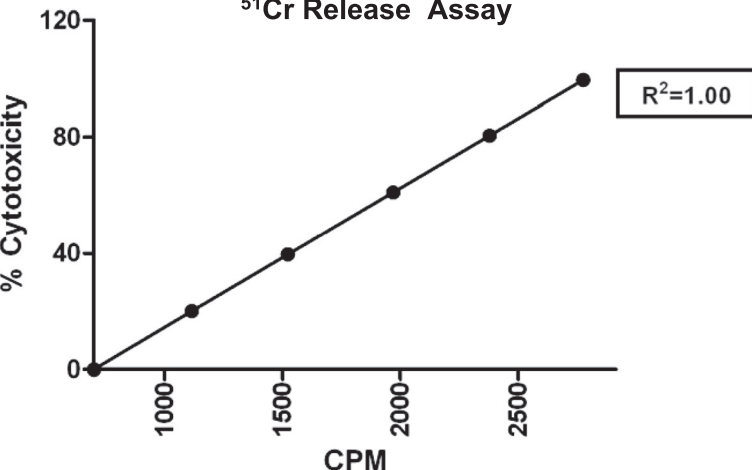

Supplement: MOESM1 [file 9465954]
